# Supplementary material for: Steam reforming of ethanol to H2 over Rh/Y2O3: crucial roles of Y2O3 oxidizing ability, space velocity, and H2/C
Source: Royal Society of Chemistry journal article supplement (doi:10.1039/b923978m), 2010-01-01
Supplement: b923978m.pdf [file b923978m.pdf]

**Steam reforming of ethanol to H<sub>2</sub> over Rh/Y<sub>2</sub>O<sub>3</sub>: Crucial roles of  
Y<sub>2</sub>O<sub>3</sub> oxidizing ability, space velocity, and H<sub>2</sub>/C**

Xusheng Wu and Sibudjing Kawi\*

Department of Chemical and Biomolecular Engineering, National University of Singapore, 4 Engineering Drive 4,  
Singapore 119260, Singapore

## Supplementary Data

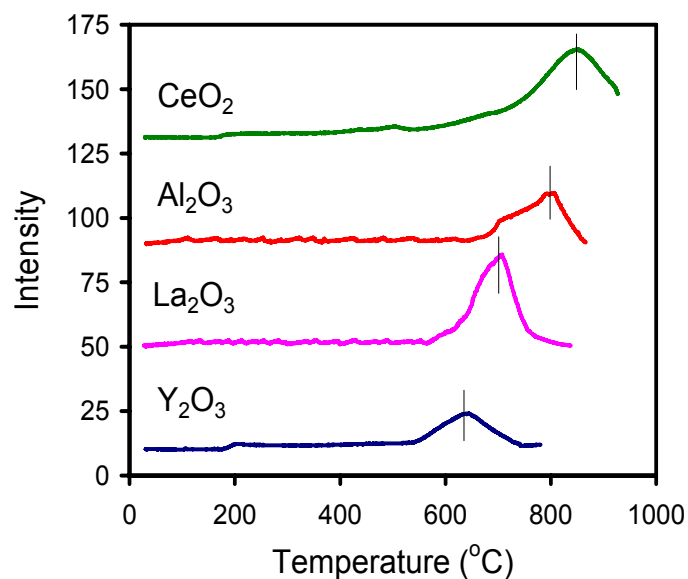

Fig. A TPR-H<sub>2</sub> analysis of four oxide catalyst supports

Fig. A shows that CeO<sub>2</sub> or Al<sub>2</sub>O<sub>3</sub> was reduced at ~845°C or ~795°C respectively, while Y<sub>2</sub>O<sub>3</sub> or La<sub>2</sub>O<sub>3</sub> was respectively reduced at ~650°C or ~695°C. Since easier reducibility of catalyst support indicates that the hydrogen from ethanol is more easily oxidised to form hydrogen gas, the TPR results show that Y<sub>2</sub>O<sub>3</sub> is easily reduced and has stronger oxidizing ability.
